# Supplementary material for: In Silico Molecular Docking and Dynamics Simulation Analysis of Potential Histone Lysine Methyl Transferase Inhibitors for Managing β-Thalassemia
Source: MDPI journal article supplement (doi:10.3390/molecules28217266), 2023-10-25
Supplement: s1 [file s1]

### Supplementary Information

**Table S1.** The table presents the results of various interactions of F80, N47, TP1, and TP2 with EHMT2 attained during docking and MDS studies.

| Ligand name | Hydrogen and hydrophobic interaction | Distance (Å) | Category      | Type                       |
|-------------|--------------------------------------|--------------|---------------|----------------------------|
| F80         | A:CYS1098:SG - C:F801506:N3          | 3.55644      | Hydrogen bond | Conventional Hydrogen Bond |
|             | C:F801506:N4 - A:LEU1086:O           | 2.92271      | Hydrogen bond | Conventional Hydrogen Bond |
|             | C:F801506:C10 - A:ASP1083:OD2        | 3.26131      | Hydrogen bond | Carbon Hydrogen Bond       |
|             | C:F801506:C10 - A:PHE1158:O          | 3.65828      | Hydrogen bond | Carbon Hydrogen Bond       |
|             | C:F801506:C16 - A:SER1084:O          | 3.4725       | Hydrogen bond | Carbon Hydrogen Bond       |
|             | C:F801506:C4 - A:ASP1088:OD1         | 3.52444      | Hydrogen bond | Carbon Hydrogen Bond       |
|             | A:ARG1157:NH1 - C:F801506            | 3.13087      | Electrostatic | Pi-Cation                  |
|             | A:LEU1086:CD1 - C:F801506            | 3.98444      | Hydrophobic   | Pi-Sigma                   |
|             | A:ALA1077 - C:F801506:C2             | 4.15024      | Hydrophobic   | Alkyl                      |
|             | C:F801506:C10 - A:ILE1161            | 4.06518      | Hydrophobic   | Alkyl                      |
|             | C:F801506:C10 - A:LYS1162            | 4.07173      | Hydrophobic   | Alkyl                      |
|             | C:F801506:C4 - A:VAL1096             | 4.44062      | Hydrophobic   | Alkyl                      |
|             | C:F801506:C4 - A:CYS1098             | 5.16483      | Hydrophobic   | Alkyl                      |
|             | A:PHE1158 - C:F801506:C10            | 4.44102      | Hydrophobic   | Pi-Alkyl                   |
|             | A:PHE1158 - C:F801506                | 5.01756      | Hydrophobic   | Pi-Alkyl                   |
|             | C:F801506 - A:ALA1077                | 4.0023       | Hydrophobic   | Pi-Alkyl                   |
|             | C:F801506 - A:CYS1098                | 5.05205      | Hydrophobic   | Pi-Alkyl                   |
|             | C:F801506 - A:LEU1086                | 4.84546      | Hydrophobic   | Pi-Alkyl                   |
|             | C:F801506 - A:ARG1157                | 4.78416      | Hydrophobic   | Pi-Alkyl                   |
| N47         | C:N471506:C6 - A:ASP1088:OD1         | 3.50018      | Hydrogen bond | Carbon hydrogen bond       |
|             | C:N471506:C12 - A:ASP1088:OD1        | 3.36383      | Hydrogen bond | Carbon hydrogen bond       |
|             | C:N471506:C - A:TYR1154              | 3.73454      | Hydrophobic   | Pi-Sigma                   |
|             | C:N471506:C18 - A:PHE1087            | 3.74022      | Hydrophobic   | Pi-Sigma                   |

|            |                            |         |               |                            |
|------------|----------------------------|---------|---------------|----------------------------|
|            | A:PHE1087 - C:N471506      | 5.11678 | Hydrophobic   | Pi-Pi T-shaped             |
|            | A:ALA1077 - C:N471506      | 3.76422 | Hydrophobic   | Alkyl                      |
|            | A:VAL1096 - C:N471506      | 4.73503 | Hydrophobic   | Alkyl                      |
|            | A:CYS1098 - C:N471506      | 4.481   | Hydrophobic   | Alkyl                      |
|            | C:N471506 - A:LEU1086      | 4.88529 | Hydrophobic   | Alkyl                      |
|            | C:N471506 - A:LEU1086      | 4.85558 | Hydrophobic   | Pi-Alkyl                   |
|            | C:N471506 - A:ARG1157      | 4.66909 | Hydrophobic   | Pi-Alkyl                   |
| <b>TP1</b> | C:SUB1:H31 - A:ASP1083:OD2 | 2.57287 | Hydrogen bond | Conventional hydrogen bond |
|            | A:ARG1157:NH1 - C:SUB1     | 3.39363 | Electrostatic | Pi-Cation                  |
|            | A:ALA1077:CB - C:SUB1      | 3.68893 | Hydrophobic   | Pi-Sigma                   |
|            | A:LEU1086:CD1 - C:SUB1     | 3.8528  | Hydrophobic   | Pi-Sigma                   |
|            | A:PHE1158:CB - C:SUB1      | 3.90749 | Hydrophobic   | Pi-Sigma                   |
|            | C:SUB1 - A:ARG1157         | 5.13898 | Hydrophobic   | Pi-Alkyl                   |
|            | C:SUB1 - A:ILE1161         | 4.80605 | Hydrophobic   | Pi-Alkyl                   |
|            | C:SUB1 - A:LEU1086         | 5.49342 | Hydrophobic   | Pi-Alkyl                   |
|            | C:SUB1 - A:CYS1098         | 4.84415 | Hydrophobic   | Pi-Alkyl                   |
|            | C:SUB1 - A:ARG1157         | 5.16907 | Hydrophobic   | Pi-Alkyl                   |
| <b>TP2</b> | A:ARG1157:NE - C:SUB1:O1   | 3.28514 | Hydrogen bond | Conventional hydrogen bond |
|            | C:SUB1:H38 - A:ASP1083:O   | 1.82219 | Hydrogen bond | Conventional hydrogen bond |
|            | C:SUB1:H49 - A:SER1084:O   | 2.29565 | Hydrogen bond | Conventional hydrogen bond |
|            | C:SUB1:C26 - A:ASP1088:OD1 | 3.45164 | Hydrogen bond | Carbon hydrogen bond       |
|            | A:ARG1157:NH1 - C:SUB1     | 3.26174 | Electrostatic | Pi-Cation                  |
|            | C:SUB1:N7 - A:TYR1154      | 3.90554 | Electrostatic | Pi-Cation                  |
|            | A:ASP1083:OD2 - C:SUB1     | 3.70387 | Electrostatic | Pi-Anion                   |
|            | A:ALA1077:CB - C:SUB1      | 3.79309 | Hydrophobic   | Pi-Sigma                   |
|            | A:LEU1086:O - C:SUB1       | 2.96418 | Other         | Pi-Lone pair               |

|                        |         |             |                |
|------------------------|---------|-------------|----------------|
| A:TYR1154 - C:SUB1     | 4.95762 | Hydrophobic | Pi-Pi stacked  |
| A:PHE1158 - C:SUB1     | 5.04117 | Hydrophobic | Pi-Pi T-shaped |
| A:ALA1077 - C:SUB1     | 4.91676 | Hydrophobic | Alkyl          |
| A:LEU1086 - C:SUB1     | 4.65418 | Hydrophobic | Alkyl          |
| C:SUB1:C26 - A:VAL1096 | 4.07355 | Hydrophobic | Alkyl          |
| C:SUB1:C26 - A:CYS1098 | 4.33742 | Hydrophobic | Alkyl          |
| C:SUB1:C23 - A:ILE1161 | 3.88775 | Hydrophobic | Alkyl          |
| C:SUB1 - A:LEU1086     | 5.47462 | Hydrophobic | Pi-Alkyl       |
| C:SUB1 - A:ARG1157     | 5.0361  | Hydrophobic | Pi-Alkyl       |
| C:SUB1 - A:ILE1161     | 5.00598 | Hydrophobic | Pi-Alkyl       |
| C:SUB1 - A:CYS1098     | 4.9569  | Hydrophobic | Pi-Alkyl       |

---

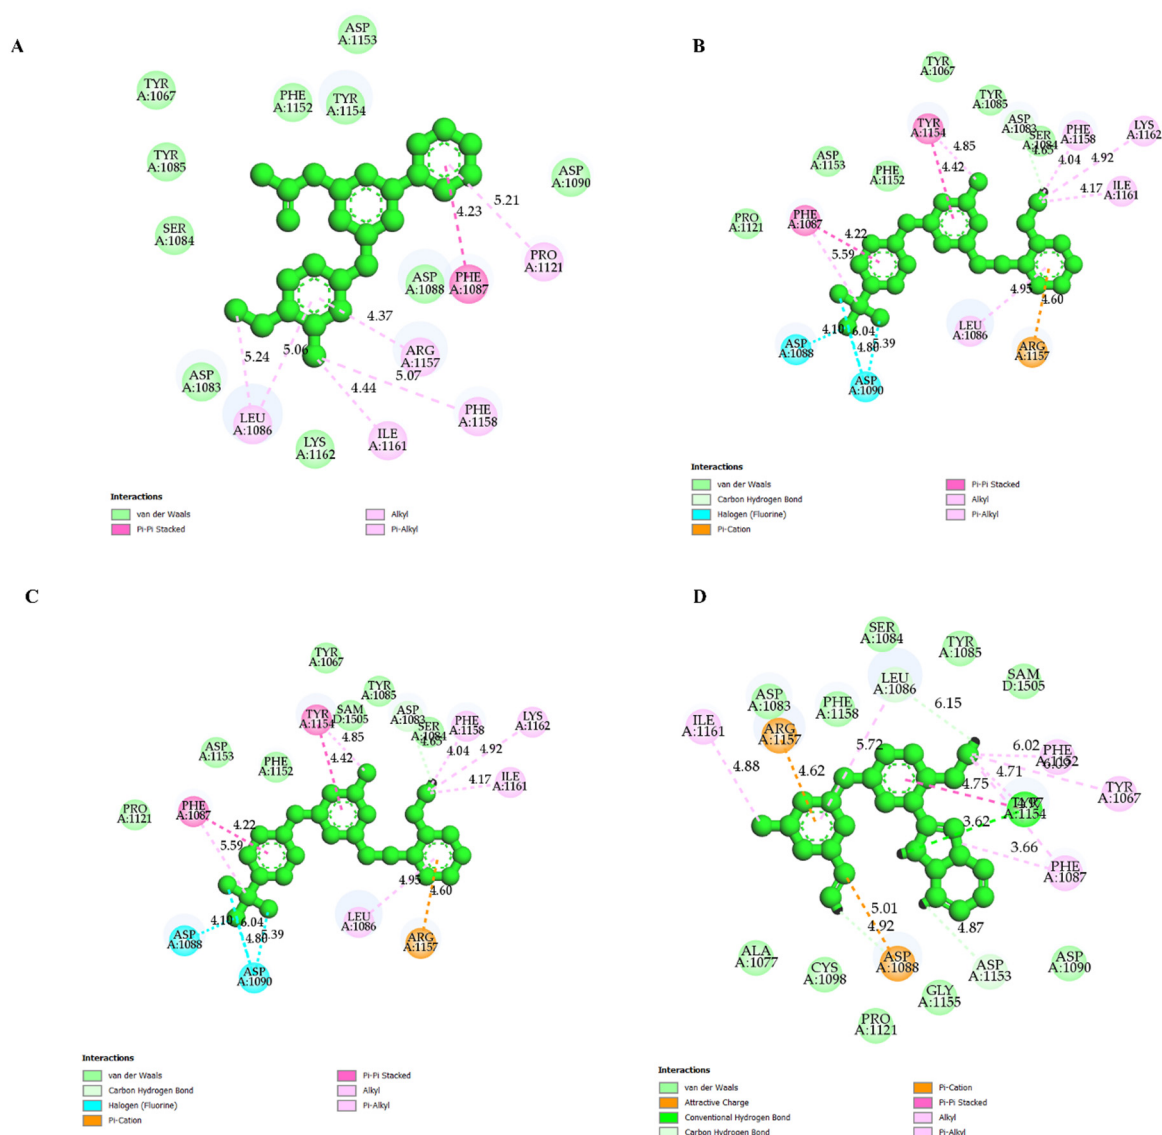

**Figure S1:** Molecular docking interaction analysis of selected compounds with EHMT2. Green color ball and stick representation denoted different ligands. The various interaction formed in each diagram is represented in different colors and is denoted as a footnote below. **A.** Tp3 docked with EHMT2. **B.** Tp4 docked with EHMT2. **C.** Tp5 docked with EHMT2. **D.** Tp6 docked with EHMT2.

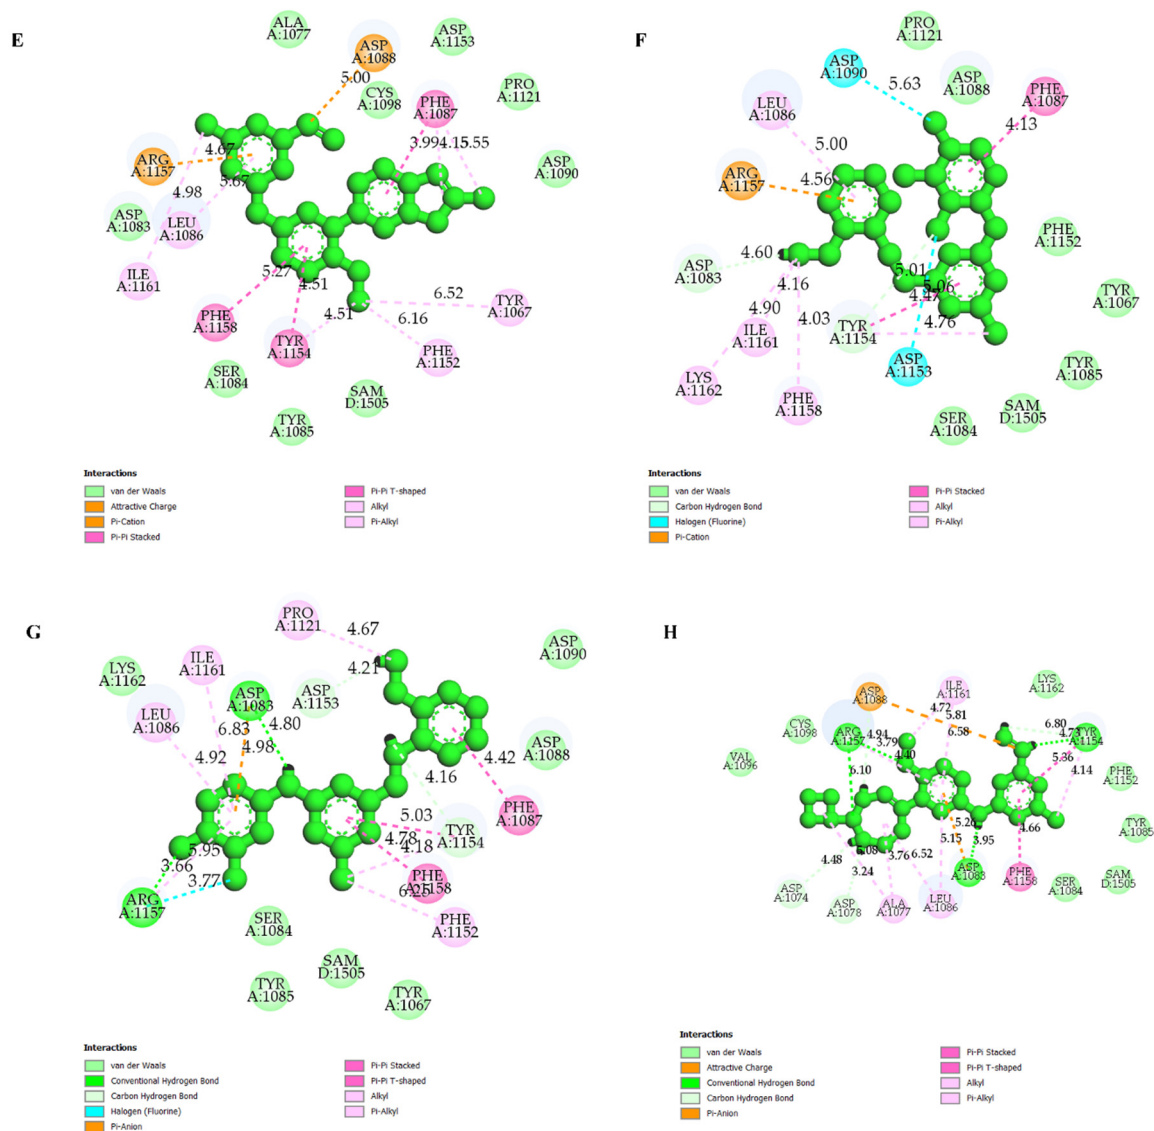

**Figure S2:** Molecular docking interaction analysis of selected compounds with EHMT2. Green color ball and stick representation denoted different ligands. The various interaction formed in each diagram is represented in different colors and is denoted as a footnote below. **E.** Tp7 docked with EHMT2. **F.** Tp8 docked with EHMT2. **G.** Tp9 docked with EHMT2. **H.** Tp10 docked with EHMT2.

**Table S2.** The table presents the results of various pharmacokinetic properties of the selected drug compounds obtained using ADMET2.0

F80

| Adsorption         |        | Metabolism        |       | Distribution    |         | Excretion  |       |
|--------------------|--------|-------------------|-------|-----------------|---------|------------|-------|
| Properties         | Value  | Properties        | Value | Properties      | Value   | Properties | Value |
| Caco2 permeability | -4.748 | CYP1A2 inhibitor  | -     | PPB             | 39.051% | CL         | 5.313 |
| MDCK permeability  | 3.8    | CYP1A2 substrate  | ++    | VD              | 2.061   | T1/2       | 0.652 |
| Pgp-inhibitor      | +++    | CYP2C19 inhibitor | --    | BBB penetration | -       |            |       |
| Pgp-substrate      | +++    | CYP2C19 substrate | ---   | Fu              | 74.862% |            |       |
| HIA                | ---    | CYP2C9 inhibitor  | ---   |                 |         |            |       |
|                    |        | CYP2C9 substrate  | ---   |                 |         |            |       |
|                    |        | CYP2D6 inhibitor  | ---   |                 |         |            |       |
|                    |        | CYP2D6 substrate  | ---   |                 |         |            |       |
|                    |        | CYP3A4 inhibitor  | --    |                 |         |            |       |
|                    |        | CYP3A4 substrate  | ++    |                 |         |            |       |

N47

| Adsorption         |        | Metabolism        |       | Distribution    |         | Excretion  |       |
|--------------------|--------|-------------------|-------|-----------------|---------|------------|-------|
| Properties         | Value  | Properties        | Value | Properties      | Value   | Properties | Value |
| Caco2 permeability | -4.761 | CYP1A2 inhibitor  | --    | PPB             | 59.647% | CL         | 5.496 |
| MDCK permeability  | 6.8    | CYP1A2 substrate  | +++   | VD              | 1.720   | T1/2       | 0.521 |
| Pgp-inhibitor      | ---    | CYP2C19 inhibitor | ---   | BBB penetration | ++      |            |       |
| Pgp-substrate      | +++    | CYP2C19 substrate | ---   | Fu              | 51.753% |            |       |

|     |     |                  |     |
|-----|-----|------------------|-----|
| HIA | --- | CYP2C9 inhibitor | --- |
|     |     | CYP2C9 substrate | --- |
|     |     | CYP2D6 inhibitor | --- |
|     |     | CYP2D6 substrate | --  |
|     |     | CYP3A4 inhibitor | --- |
|     |     | CYP3A4 substrate | +++ |

# TP1

| Adsorption         |        | Metabolism        |       | Distribution    |         | Excretion  |       |
|--------------------|--------|-------------------|-------|-----------------|---------|------------|-------|
| Properties         | Value  | Properties        | Value | Properties      | Value   | Properties | Value |
| Caco2 permeability | -4.763 | CYP1A2 inhibitor  | +++   | PPB             | 99.794% | CL         | 5.193 |
| MDCK permeability  | 2.4    | CYP1A2 substrate  | ++    | VD              | 2.065   | T1/2       | 0.174 |
| Pgp-inhibitor      | ++     | CYP2C19 inhibitor | ++    | BBB penetration | --      |            |       |
| Pgp-substrate      | ---    | CYP2C19 substrate | ---   | Fu              | 0.927%  |            |       |
| HIA                | ---    | CYP2C9 inhibitor  | +     |                 |         |            |       |
|                    |        | CYP2C9 substrate  | ---   |                 |         |            |       |
|                    |        | CYP2D6 inhibitor  | ++    |                 |         |            |       |
|                    |        | CYP2D6 substrate  | --    |                 |         |            |       |
|                    |        | CYP3A4 inhibitor  | +     |                 |         |            |       |
|                    |        | CYP3A4 substrate  | +     |                 |         |            |       |

TP2

| Adsorption           |        | Metabolism           |       | Distribution    |         | Excretion  |       |
|----------------------|--------|----------------------|-------|-----------------|---------|------------|-------|
| Properties           | Value  | Properties           | Value | Properties      | Value   | Properties | Value |
| Caco2 permeability   | -4.715 | CYP1A2<br>inhibitor  | ++    | PPB             | 93.952% | CL         | 4.507 |
| MDCK<br>permeability | 5.7    | CYP1A2<br>substrate  | +++   | VD              | 0.989   | T1/2       | 0.457 |
| Pgp-inhibitor        | +++    | CYP2C19<br>inhibitor | +     | BBB penetration | --      |            |       |
| Pgp-substrate        | +++    | CYP2C19<br>substrate | ---   | Fu              | 6.730%  |            |       |
| HIA                  | -      | CYP2C9<br>inhibitor  | --    |                 |         |            |       |
|                      |        | CYP2C9<br>substrate  | ---   |                 |         |            |       |
|                      |        | CYP2D6<br>inhibitor  | ---   |                 |         |            |       |
|                      |        | CYP2D6<br>substrate  | --    |                 |         |            |       |
|                      |        | CYP3A4<br>inhibitor  | +     |                 |         |            |       |
|                      |        | CYP3A4<br>substrate  | +++   |                 |         |            |       |

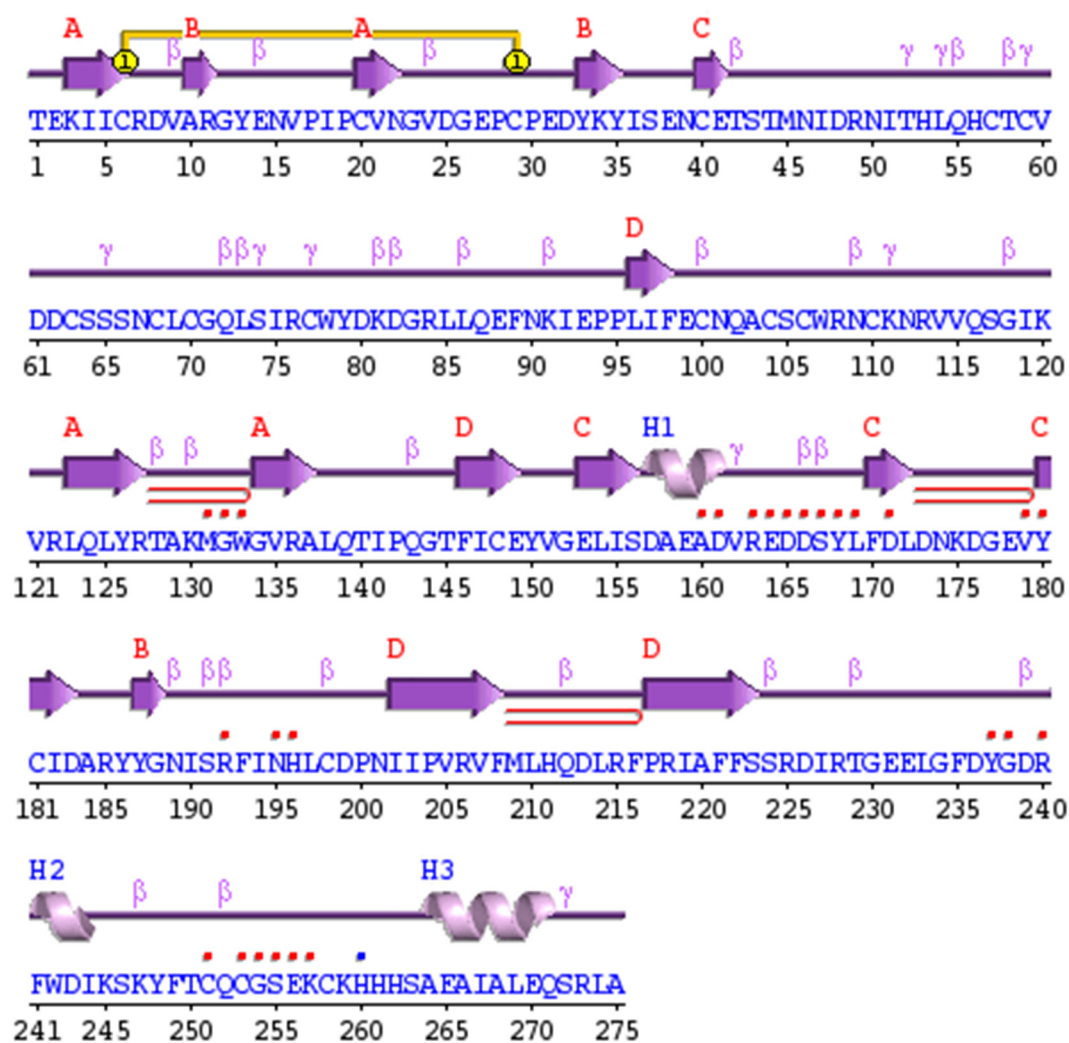

**Figure S3:** Secondary structure representation of EHM2 protein. The figure shows the presence of  $\beta$ -sheets, helices corresponding to the amino acids. The red asterisk denotes the residues catalytically essential and interacts with ligands.

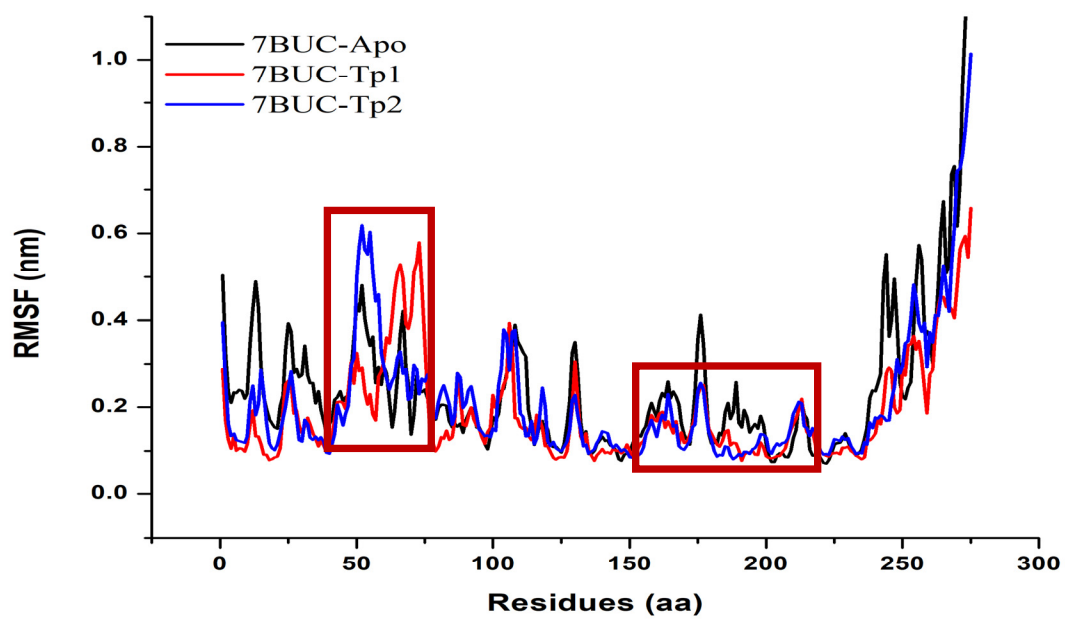

**Figure S4:** RMSF plot of docked complexes generated through MDS at 200 ns. The black color plot indicates the EHMT2 apo form. The red color plot indicates the Tp1 and the Blue color indicates the Tp2.

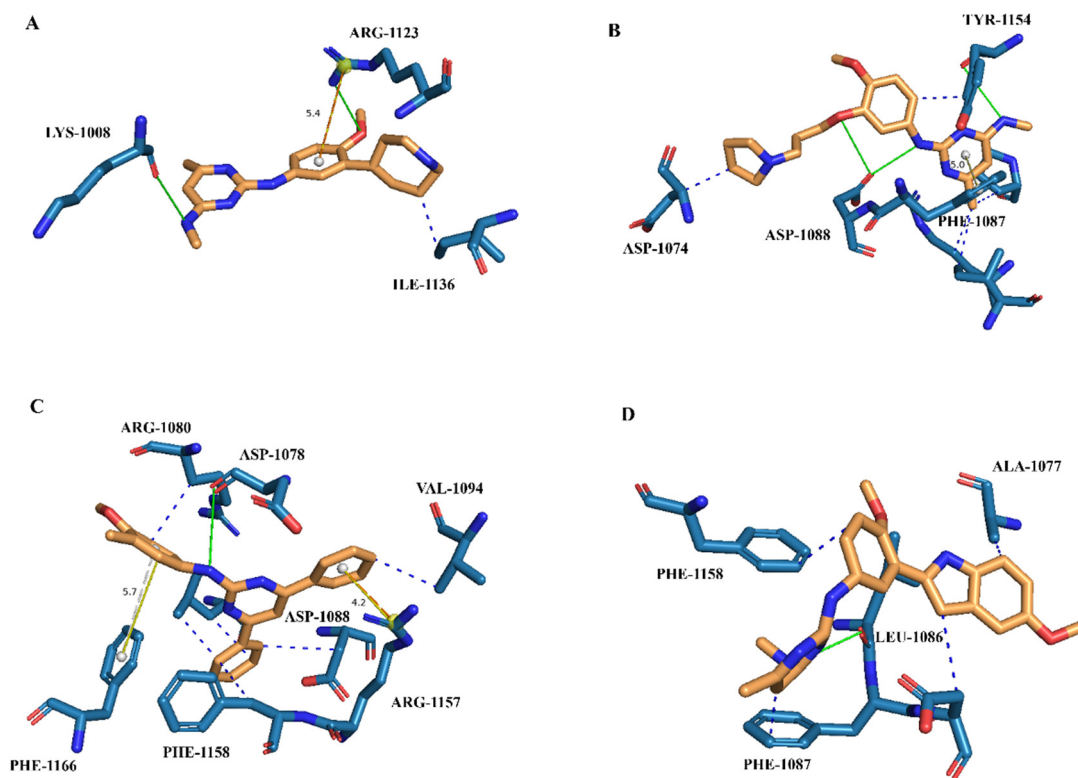

**Figure S5.** Molecular interactions analysis of docked complexes generated through MDS at 200 ns. (A). Hydrogen, hydrophobic bonds formed between 7BUC complexed with F80. (B) Hydrogen,  $\pi$ - $\pi$  stacking, and hydrophobic bonds formed between 7BUC complexed with N47. (C) Hydrogen, cation-  $\pi$ ,  $\pi$ - $\pi$  stacking and hydrophobic bonds formed between 7BUC complexed with TP1, and (D) Hydrogen, hydrophobic bonds formed between 7BUC complexed with TP2.

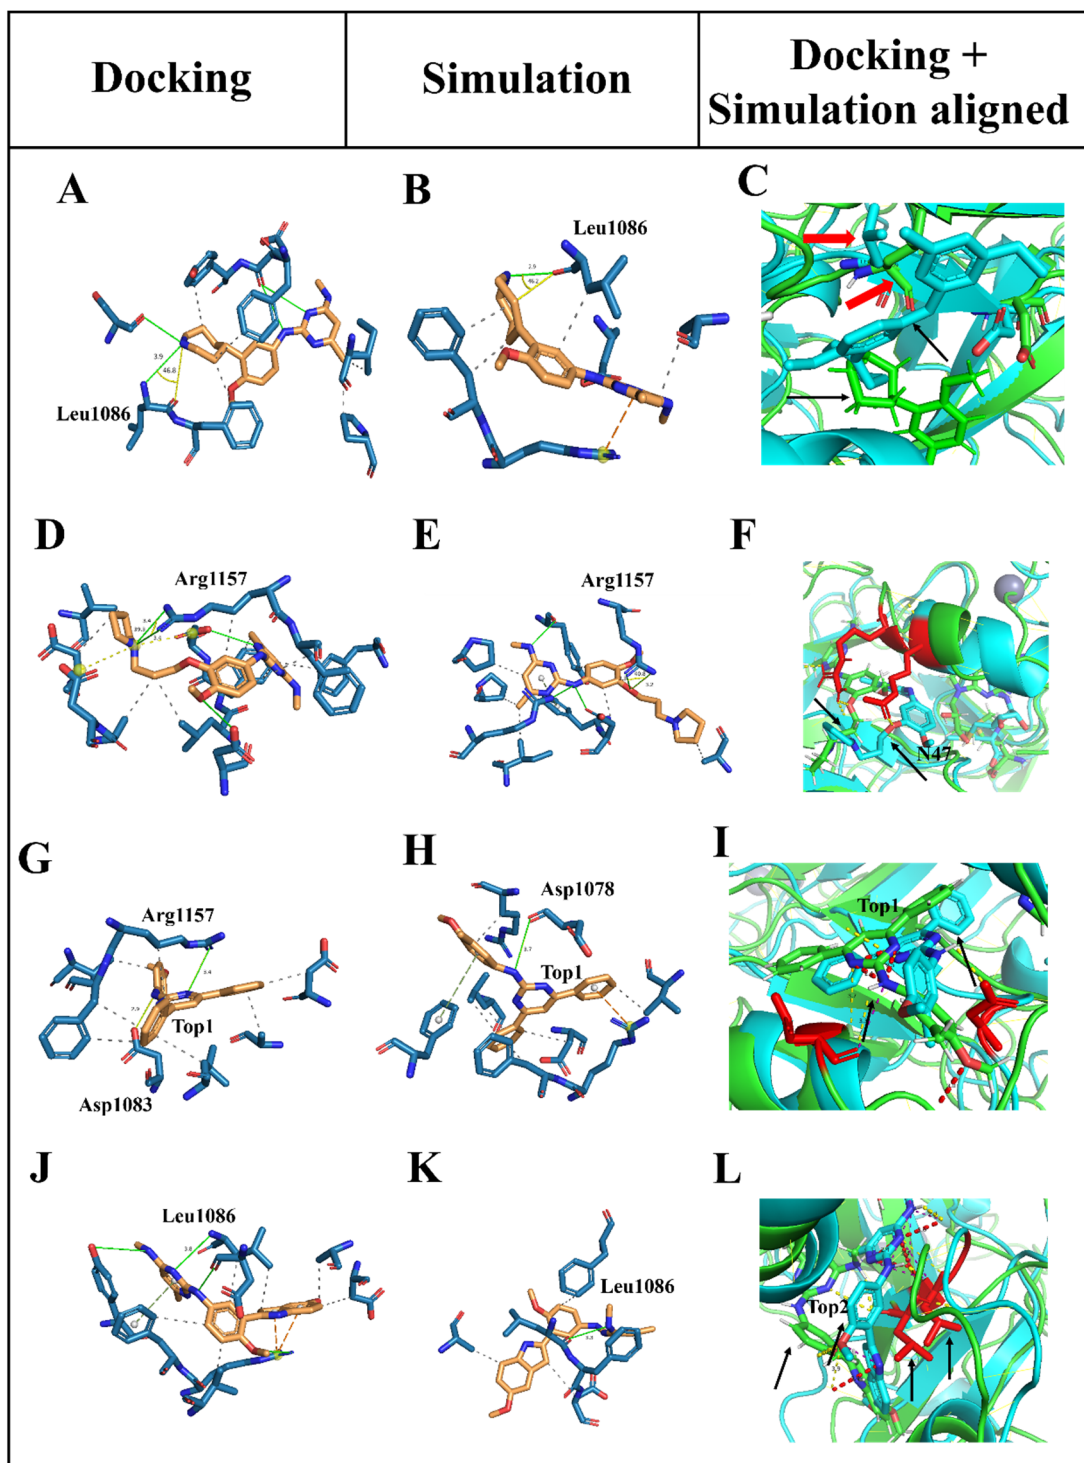

**Figure S6** Comparative molecular interactions analysis of docked complexes generated through MDS at 200 ns. (A). Interactions formed between 7BUC complexed with F80 while docking. (B) Interactions formed between 7BUC complexed with F80 while simulation (C) Superimposition of docked and simulated F80 with 7BUC. (D). Interactions formed between 7BUC complexed with N47 while docking. (E) Interactions formed between 7BUC complexed with N47 while simulation (F) Superimposition of docked and simulated N47 with 7BUC. (G). Interactions formed between 7BUC complexed with Tp1 while docking. (H) Interactions formed between 7BUC complexed with Tp1 while simulation (I) Superimposition of docked and simulated Tp1 with 7BUC. (J). Interactions formed between 7BUC complexed with Tp2 while docking. (K) Interactions formed between 7BUC complexed with Tp2 while simulation (L) Superimposition of docked and simulated Tp2 with 7BUC.
